# Supplementary material for: ZIF-8/ZIF-67-derived 3D amorphous carbon-encapsulated CoS/NCNTs supported on CoS-coated carbon nanofibers as an advanced potassium-ion battery anode
Source: Royal Society of Chemistry journal article supplement (doi:10.1039/c8ta12457d), 2019-01-01
Supplement: c8ta12457d1.pdf [file c8ta12457d1.pdf]

## Supporting Information

### **ZIF-8/ZIF-67-derived 3D amorphous carbon-encapsulated CoS/N-CNTs supported on CoS-coated carbon nanofibers as an advanced potassium-ion battery anode**

Wenfang Miao, Yu Zhang, Haotian Li, Zihao Zhang, Ling Li,\* Ze Yu,\* Wenming Zhang\*

<sup>a</sup>Hebei Key Laboratory of Optic-electronic Information and Materials, College of Physics Science and Technology, Hebei University, Baoding 071002, China. \*E-mail: lilinghbu@163.com, wmzhanghbu@126.com

<sup>b</sup>State Key Laboratory of Fine Chemicals, Institute of Artificial Photosynthesis, DUT-KTH Joint Education and Research Center on Molecular Devices, Dalian University of Technology (DUT), Dalian 116024, China. \*E-mail: ze.yu@dlut.edu.cn

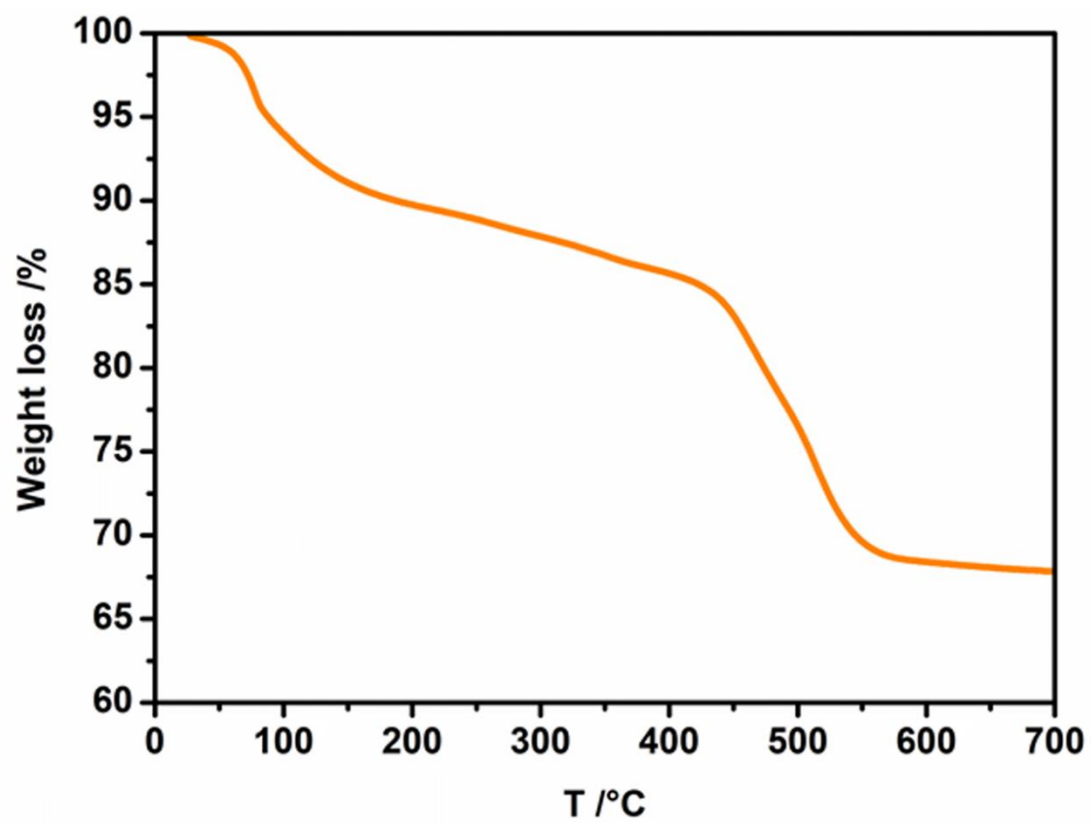

Fig. S1. Thermogravimetric analysis (TGA) curve of AC@CoS/NCNTs/CoS@CNFs.

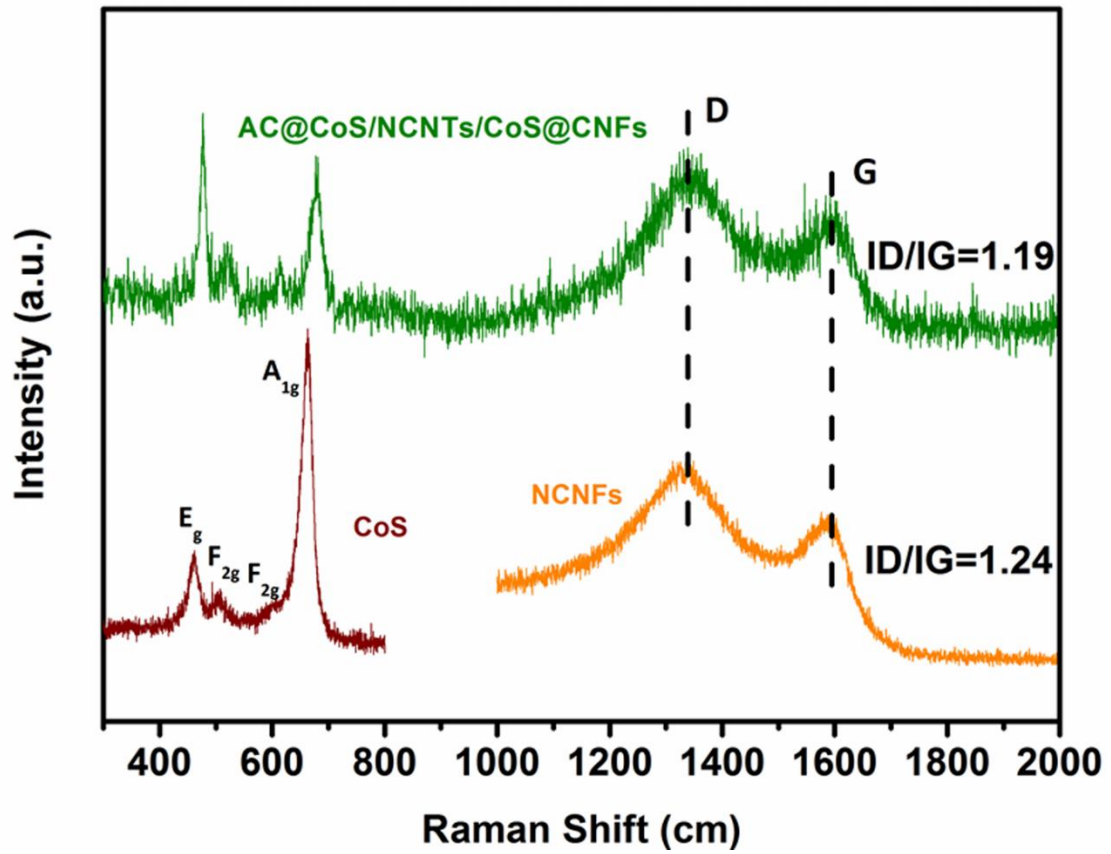

Fig. S2. Raman spectra of CoS, NCNFs, and AC@CoS/NCNTs/CoS@CNFs.

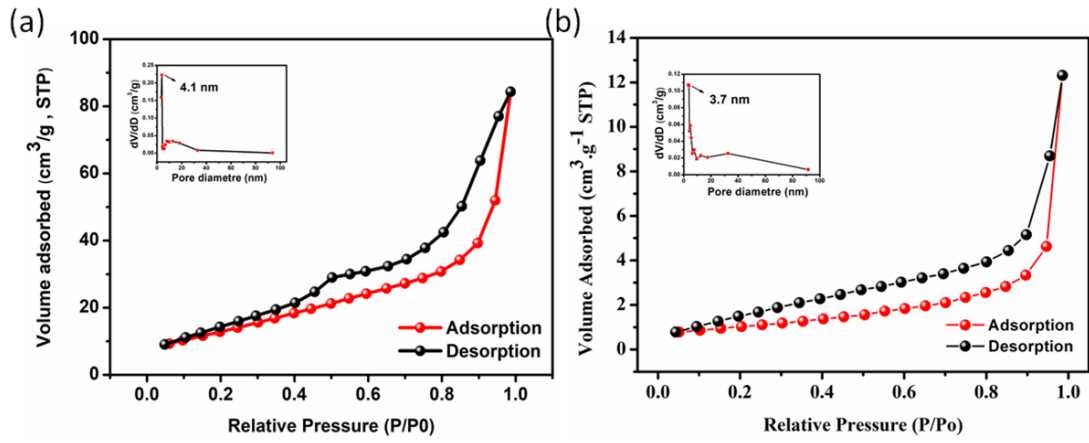

Fig. S3. N<sub>2</sub> adsorption/desorption isotherms and the corresponding BJH distributions (inset) of (a) CoS and (b) NCNFs.

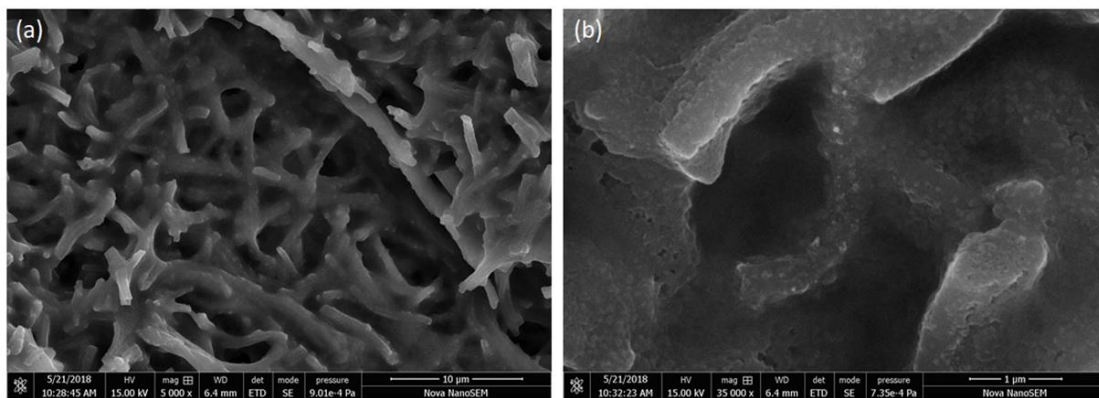

Fig. S4. SEM images (a, b) of the AC@CoS/NCNTs/CoS@CNFs electrode after 100 charge/discharge cycles.

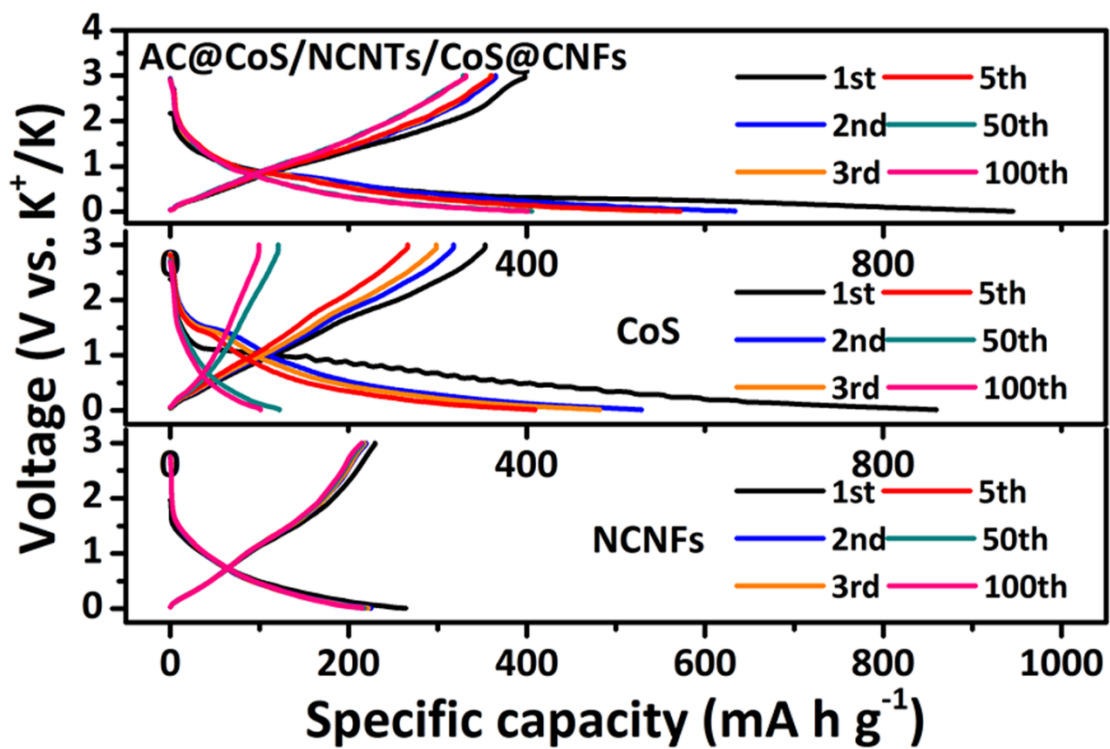

Fig. S5. Charge/discharge curves of the (a)AC@CoS/NCNTs/CoS@CNFs composite, (b) CoS and (c)NCNFs at 0.1 A g<sup>-1</sup>.

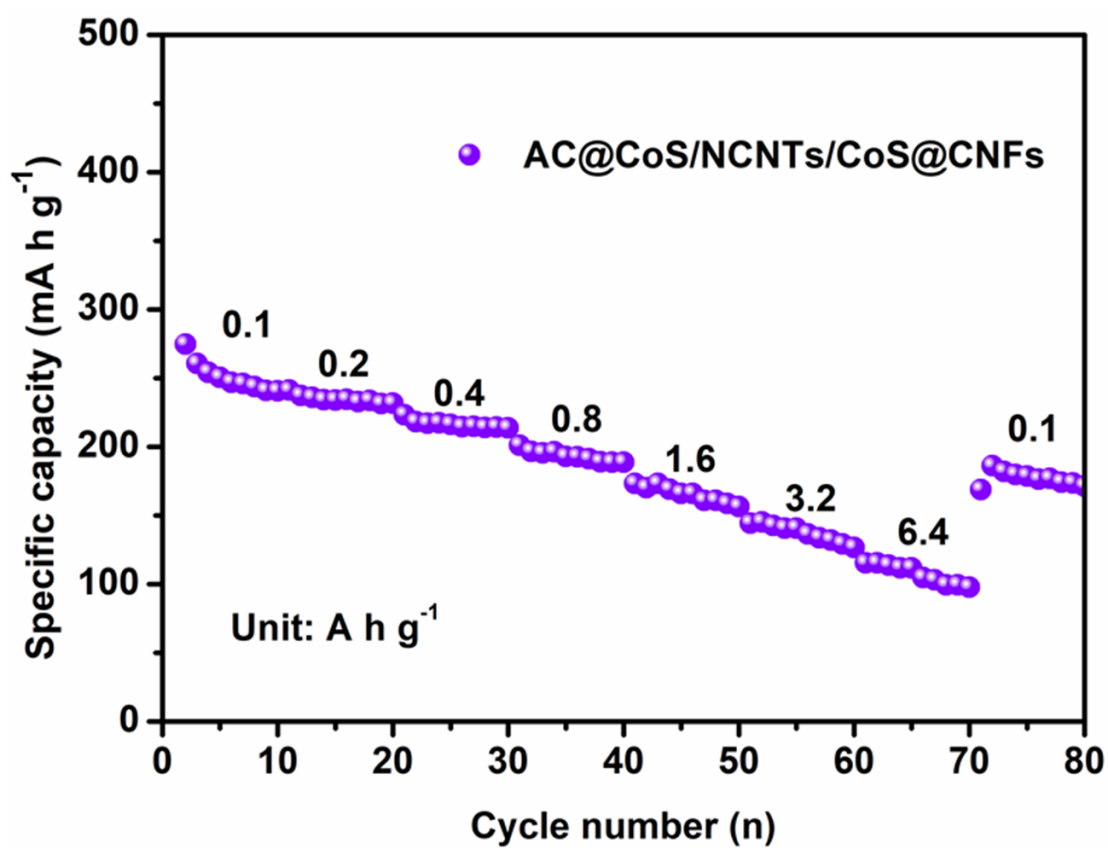

Fig. S6. Rate capabilities measured at various current densities from 0.1 to 6.4  $\text{A g}^{-1}$  of the AC@CoS/NCNTs/CoS@CNFs anode in NIBs.

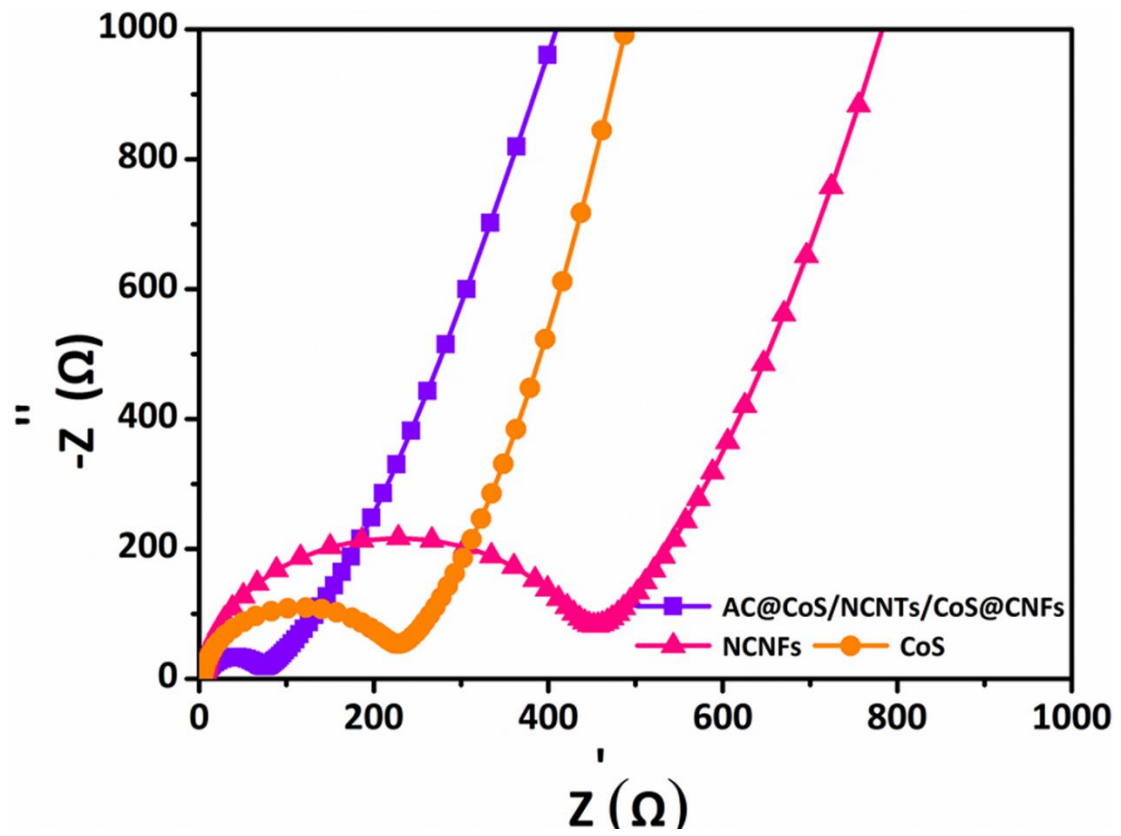

Fig. S7. EIS curves and the corresponding equivalent circuit of the electrodes in NIBs.



| Materials                            | High rate capacity (mA h g <sup>-1</sup> )          | Cyclic performance                                                                                                               |
|--------------------------------------|-----------------------------------------------------|----------------------------------------------------------------------------------------------------------------------------------|
| Expanded Graphite <sup>1</sup>       | 175 mA h g <sup>-1</sup> (0.2 A g <sup>-1</sup> )   | 228 mA h g <sup>-1</sup> at 0.05 A g <sup>-1</sup> , 200 cycles                                                                  |
| Nitrogen-Doped Graphene <sup>2</sup> |                                                     | 250 mA h g <sup>-1</sup> at 0.1 A g <sup>-1</sup> , 100cycles                                                                    |
| Graphite <sup>3</sup>                | 80 mA h g <sup>-1</sup> (0.27 A g <sup>-1</sup> )   | 100 mA h g <sup>-1</sup> at 0.14 A g <sup>-1</sup> , 50 cycles                                                                   |
| PODG <sup>4</sup>                    | 165 mA h g <sup>-1</sup> (2 A g <sup>-1</sup> )     | 500 mA h g <sup>-1</sup> at 0.05 A g <sup>-1</sup> , 50cycles                                                                    |
| Activated carbon <sup>5</sup>        | 30 mA h g <sup>-1</sup> (1.5 A g <sup>-1</sup> )    | 62 mA h g <sup>-1</sup> at 0.2 A g <sup>-1</sup> , 100 cycles                                                                    |
| Carbon Nanospheres <sub>6</sub>      | 150 mA h g <sup>-1</sup> (1.4 A g <sup>-1</sup> )   | 212 mA h g <sup>-1</sup> at 0.58 A g <sup>-1</sup> , 100 cycles                                                                  |
| Hard–Soft Carbon <sup>7</sup>        | 121 mA h g <sup>-1</sup> (2.8 A g <sup>-1</sup> )   | 200 mA h g <sup>-1</sup> at 0.3 A g <sup>-1</sup> , 100 cycles                                                                   |
| Porous Carbon Nanofiber <sup>8</sup> | 80 mA h g <sup>-1</sup> (7.7 A g <sup>-1</sup> )    | 200 mA h g <sup>-1</sup> at 0.2 A g <sup>-1</sup> , 1200 cycles                                                                  |
| NCNTs <sup>9</sup>                   |                                                     | 254 mA h g <sup>-1</sup> at 0.05 A g <sup>-1</sup> , 300 cycles; 100 mA h g <sup>-1</sup> at 2 A g <sup>-1</sup> , 500cycles     |
| Pencil-Trace <sup>10</sup>           | 70 mA h g <sup>-1</sup> (1.1 A g <sup>-1</sup> )    | 110 mA h g <sup>-1</sup> at 0.4 A g <sup>-1</sup> , 350cycles                                                                    |
| OMC <sup>11</sup>                    | 146 mA h g <sup>-1</sup> (1 A g <sup>-1</sup> )     | 130 mA h g <sup>-1</sup> at 1 A g <sup>-1</sup> , 1000 cycles; 270 mA h g <sup>-1</sup> at 0.05 A g <sup>-1</sup> , 100 cycles   |
| NOHPHC <sup>12</sup>                 | 118 mA h g <sup>-1</sup> (3 A g <sup>-1</sup> )     | 230 mA h g <sup>-1</sup> at 0.05 A g <sup>-1</sup> , 100 cycles                                                                  |
| This work                            | 133.1 mA h g <sup>-1</sup> (6.4 A g <sup>-1</sup> ) | 401 mA h g <sup>-1</sup> at 0.1 A g <sup>-1</sup> , 100 cycles<br>130 mA h g <sup>-1</sup> at 3.2 A g <sup>-1</sup> , 600 cycles |

Table S1. The comparison of electrochemical performance between AC@CoS/NCNTs/CoS@CNFs and other reported anode materials for KIBs.

1 Y. L. An, H. F. Fei, G. F. Zeng, L. J. Ci, B. J. Xi, S. L. Xiong, J. K. Feng, *J. Power Sources*, 2018, **378**, 66.

2 K. Share, A. P. Cohn, R. Carter, B. Rogers, C. L. Pint, *Acs Nano*, 2016, **10**, 9738.

3 Z.L. Jian, W. Luo, X. L. Ji, *J. Am. Chem. Soc.*, 2015, **137**, 11566.

- 4 G. Y. Ma, K. S. Huang, J. S. Ma, Z. C. Ju, Z. Xing, Q. C. Zhuang, *J. Mater. Chem. A*, 2017, **5**, 7854.
- 5 Z.X. Tai, Q. Zhang, Y. J. Liu, H. K. Liu, S. X. Dou, *Carbon*, 2017, **123**, 54.
- 6 D. S. Bin, Z. X. Chi, Y. T. Li, K. Zhang, X. Z. Yang, Y. G. Sun, J. Y. Piao, A. M. Cao, L. J. Wan, *J. Am. Chem. Soc.*, 2017, **139**, 13492.
- 7 Z. L. Jian, S. Hwang, Z. F. Li, A. S. Hernandez, X. F. Wang, Z. Y. Xing, D. Su, X. L. Ji, *Adv. Funct. Mater.*, 2017, **27**, 1700324.
- 8 X. X. Zhao, P. X. Xiong, J. F. Meng, Y. Q. Liang, J. W. Wang, Y. H. Xu, *J. Mater. Chem. A*, 2017, **5**, 19237.
- 9 P. X. Xiong, X. X. Zhao, Y. H. Xu, *ChemSusChem*, 2018, **11**, 202.
- 10 Z. Tai, Y. Liu, Q. Zhang, T. Zhou, Z. Guo, H. K. Liu, S. X. Dou, *GEE* 2017, **2**, 278.
- 11 W. Wang, J. H. Zhou, Z. P. Wang, L. Y. Zhao, P. H. Li, Y. Yang, C. Yang, H. X. Huang, S. J. Guo, *Adv. Energy Mater.* 2018, **8**, 1701648.
- 12 J. L. Yang, Z. C. Ju, Y. Jiang, Z. Xing, B. J. Xi, J. K. Feng, S. L. Xiong, *Adv. Mater.*, 2018, **30**, 1700104.
